# Supplementary material for: Regulating the pyrolysis process of cation intercalated MnO2 nanomaterials for electrocatalytic urea oxidation performance
Source: Royal Society of Chemistry journal article supplement (doi:10.1039/d2ra04032h), 2022-01-01
Supplement: d2ra04032h1.pdf [file d2ra04032h1.pdf]

## Supplementary Information

# Regulating Pyrolysis Process of Cation Intercalated MnO<sub>2</sub> Nanomaterials for and Electrocatalytic Urea Oxidation Performance

Yuxin Shi<sup>a</sup>, Jianing Li<sup>a</sup>, Xu Zhang<sup>a</sup>, Kai Zhao<sup>a</sup>, Zheng Wang<sup>a\*</sup>, Zhao Wang<sup>b\*</sup>, Xu Peng<sup>a\*</sup>

<sup>a</sup> Collaborative Innovation Center for Advanced Organic Chemical Materials Co-constructed by the Province and Ministry, College of Chemistry & Chemical Engineering, Hubei University, Wuhan, 430062, P. R. China.

<sup>b</sup> Equine Science Research and Doping Control Center, Wuhan Business University, Wuhan 430056, People's Republic of China.

## Table of Contents

| No.       | Name                                                                                                                                                          | Page |
|-----------|---------------------------------------------------------------------------------------------------------------------------------------------------------------|------|
| <b>1</b>  | Experimental Section                                                                                                                                          | 3    |
| <b>2</b>  | Figure S1 XRD patterns of H-MnO <sub>2</sub> at 190, 220, 260, 400, 600 °C.                                                                                   | 5    |
| <b>3</b>  | Figure S2 SEM images of 2D-MnO <sub>2</sub> particle size. Figure S2 XRD pattern of the bulk 2D MnO <sub>2</sub> (a) and H-MnO <sub>2</sub> (b).              | 6    |
| <b>4</b>  | Figure S3 XRD pattern of the bulk 2D MnO <sub>2</sub> (a) and H-MnO <sub>2</sub> (b). Figure S4 TG-MS analysis of 1D MnO <sub>2</sub> nanomaterials.          | 7    |
| <b>5</b>  | Figure S4 TG-MS analysis of 1D MnO <sub>2</sub> nanomaterials.                                                                                                | 8    |
| <b>6</b>  | Figure S5 TG-MS analysis of low-dimensional MnO <sub>2</sub> nanomaterials.                                                                                   | 9    |
| <b>7</b>  | Figure S6 TG-MS analysis of low-dimensional MnO <sub>2</sub> nanomaterials. Figure S5 XRD patterns of 1D-MnO <sub>2</sub> at 240, 330, 400, 540, 700, 800 °C. | 10   |
| <b>8</b>  | Figure S7 XPS spectra of Mn 3s peak of (a) H-MnO <sub>2</sub> -260, (b) 1D-MnO <sub>2</sub> -400, (c) 2D-MnO <sub>2</sub> -550.                               | 11   |
| <b>9</b>  | Figure S8 XPS spectra of Mn 2p peak of (a) H-MnO <sub>2</sub> -260, (b) 1D-MnO <sub>2</sub> -400, (c) 2D-MnO <sub>2</sub> -550.                               | 12   |
| <b>10</b> | Figure S9 Linear sweep voltammetry and Tafel plots of 2D-MnO <sub>2</sub>                                                                                     | 13   |
| <b>11</b> | Figure S10 Linear sweep voltammetry and Tafel plots of H-MnO <sub>2</sub>                                                                                     | 14   |
| <b>12</b> | Figure S11 Linear sweep voltammetry and Tafel plots of 1D-MnO <sub>2</sub>                                                                                    | 15   |
| <b>13</b> | Figure S12 Blank cyclic voltammograms image.                                                                                                                  | 16   |

## **Experimental Section**

### **Materials characterizations:**

The thermogravimetric analysis (TGA) were performed using a Pyris Diamond TG/DTA under a constant flow of dry nitrogen gas at a heating rate of 5 °C·min<sup>-1</sup>. The thermogravimetric analysis was performed on a Rigaku Thermo Mass Photo (TG-MS) with a Skimmer type mass spectrometer (MS/EI). The measurements were conducted from 20-800 °C with 5 K/min gradient. Powder X-ray diffraction (PXRD) spectra were recorded on either a D8 Advance (Bruker) or a Rigaku D/max-III A diffractometer (Cu K $\alpha$ ,  $\lambda$  = 1.54056 Å) at 293 K. The morphologies were investigated using a JSM-IT500 (Japan) Scanning Electron Microscopy (SEM).

### **X-ray Absorption Spectroscopy (XAS) test.**

The Mn L-edge XANES spectra were measured at the beamline BL12B of National Synchrotron Radiation Laboratory (NSRL, Hefei) using the linearly polarized X-ray beam in the total electron yield (TEY) mode by collecting the sample drain current under a vacuum better than 10<sup>-7</sup> Pa. The beam from the bending magnet was monochromatized utilizing a varied line-spacing plane grating and refocused by a toroidal mirror. The energy range is 100–1000 eV with an energy resolution of ca. 0.2 eV.

### **Synthesis of bulk 2D MnO<sub>2</sub>**

In a typical experiment, 3 mmol MnCl<sub>2</sub>•4H<sub>2</sub>O was added into 10 mL H<sub>2</sub>O. After vigorous stirring for 20 min, the MnCl<sub>2</sub>•4H<sub>2</sub>O was totally dissolved becoming a homogenous solution, called “solution A”. Then, 4.0 g (NH<sub>4</sub>)<sub>2</sub>S<sub>2</sub>O<sub>8</sub> was added into 10 mL H<sub>2</sub>O, after vigorous stirring for 20 min, 4.375 g TMAOH (25 % wt) was added into the mixed solution followed by another 20 min stirring and adding amount of water to 20 mL, called “solution B”. Then “the solution B” was added into “solution A” slowly in 10 min under vigorous stirring. The dark brown MnO<sub>2</sub> sample was obtained after vigorously stirring overnight in the ambient atmosphere at room-temperature. After this mild oxidation reaction, the precipitate was washed with methanol and water three times and centrifuged at 6000 rpm for 3 min, then the precipitate was dried in a vacuum oven at 60°C.

### **Synthesis of colloidal MnO<sub>2</sub>**

The MnO<sub>2</sub> nanosheets were synthesized in a reported method. Typically, 20 mL of a mixed aqueous solution of 0.6 M TMAOH and 3 wt % H<sub>2</sub>O<sub>2</sub> was added to 10 mL of 0.3 M MnCl<sub>2</sub>•4H<sub>2</sub>O aqueous solution within 15 s. The solution became dark brown immediately as the mixed aqueous solution added,

showing the evidence that  $\text{Mn}^{2+}$  was oxidized to  $\text{Mn}^{4+}$ . This whole mixed aqueous solution was vigorously stirred overnight in the ambient atmosphere at room temperature. After this mild oxidation process, the precipitate was washed with water and methanol and centrifuged in a very low speed of  $2000 \text{ r}\cdot\text{min}^{-1}$  for 20 mins, after which the precipitate was dried in a vacuum oven at  $60 \text{ }^\circ\text{C}$ .

#### **Synthesis of 1D- $\text{MnO}_2$**

The 1D  $\text{MnO}_2$  was synthesized by the hydrothermal method. In a typical synthesis, 2 mmol  $\text{KMnO}_4$  and 2 mmol  $\text{NH}_4\text{F}$  were added to 80 ml of distilled water and magnetically stirred at room temperature for 20 min. The sample was then placed into a 100 ml autoclave and heated at  $160 \text{ }^\circ\text{C}$  for 24 h. After the sample was washed and dried, a brownish-black powder was obtained.

#### **Synthesis of treated $\text{MnO}_2$ with different pyrolysis condition.**

The treated  $\text{MnO}_2$  was obtained from pyrolysis the aforementioned three types of  $\text{MnO}_2$  by TG-MS with EI source. The measurements were conducted from room temperature to target temperature with  $10 \text{ K}\cdot\text{min}^{-1}$  gradient. The samples finally cooled down to room temperature. In our case, the pyrolysis temperatures of partially treated  $\text{MnO}_2$  and totally treated  $\text{MnO}_2$  are  $220 \text{ }^\circ\text{C}$  and  $260 \text{ }^\circ\text{C}$ , respectively. The pyrolysis temperature of H- $\text{MnO}_2$  are  $190$ ,  $220$  and  $260 \text{ }^\circ\text{C}$ , respectively.

#### **Thermogravimetric Analysis Combined with Mass Spectrometry (TG-MS)**

The thermogravimetric analysis was performed on a Rigaku Thermo Mass Photo (TG-MS) with a Skimmer type mass spectrometer (MS/EI). The measurements were conducted from  $30$ - $800 \text{ }^\circ\text{C}$  with  $5 \text{ K}\cdot\text{min}^{-1}$  gradient, after which the samples were cooled down to room temperature. The weight of initial samples was about  $3.0 \text{ mg}$ , and the pyrolysis process was conducted under a helium gas flow of  $300 \text{ mL}\cdot\text{min}^{-1}$ .

#### **Electrochemical tests.**

The UOR performance was tested in a three-electrode system by CV test at scan rates of  $5$ - $100 \text{ mV}\cdot\text{s}^{-1}$  at an electrochemical station (CHI 760E). An Hg/HgO (saturated KCl solution) electrode was used as reference electrode, while the counter electrode was a graphite rod electrode. The as-obtained  $\text{MnO}_2/\text{NF}$  was directly used as working electrode for electrochemical test in the solution of  $1 \text{ M KOH} + 0.33 \text{ M urea}$ . The working electrodes underwent active process using CV tests several times until stabilization before data collection. Electrochemical impedance spectroscopy (EIS) measurements of the catalysts were performed at a potential of  $1.417 \text{ V vs RHE}$  by using an AC voltage with  $5 \text{ mV}$  amplitude in a frequency range from  $10 \text{ kHz}$  to  $100 \text{ mHz}$ .



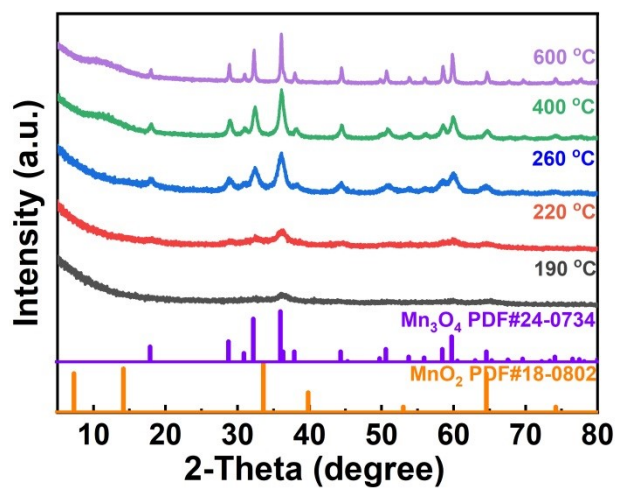

Figure S1 XRD patterns of H-MnO<sub>2</sub> at 190, 220, 260, 400, 600 °C.

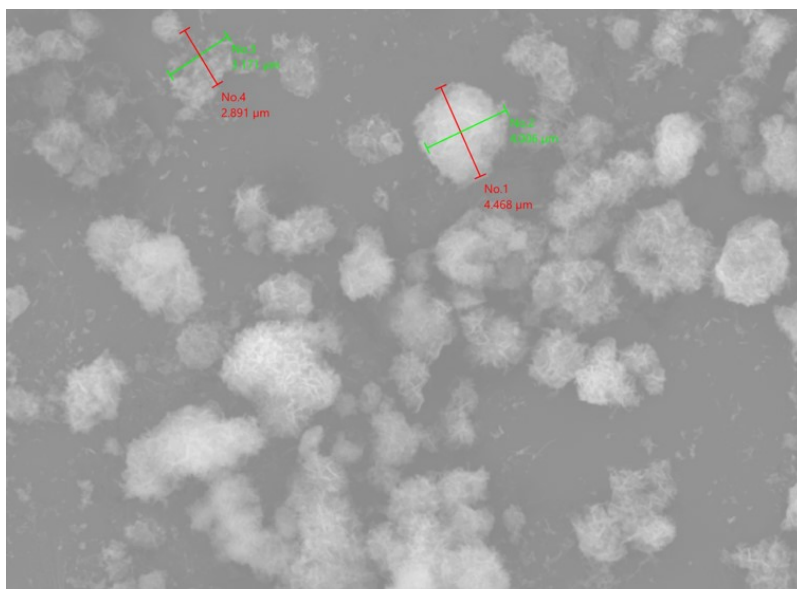

Figure S2 SEM images of 2D-MnO<sub>2</sub> particle size.

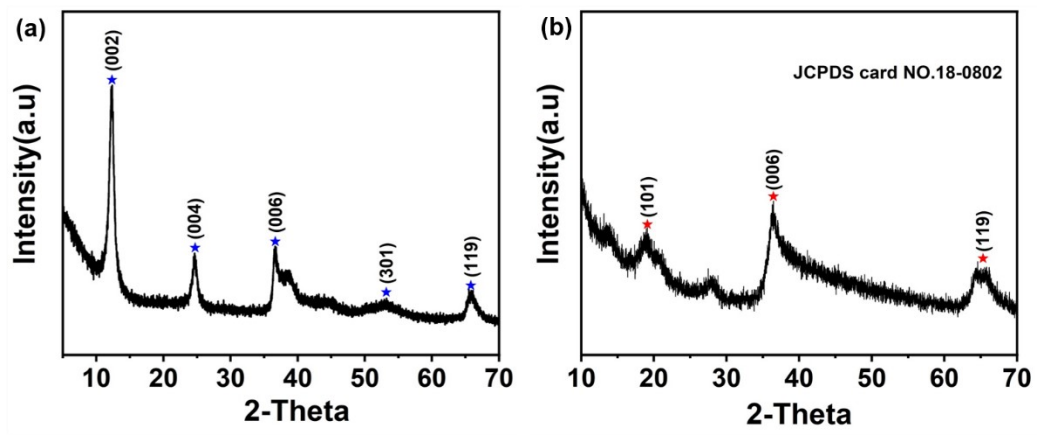

Figure S3 XRD pattern of the bulk 2D MnO<sub>2</sub> (a) and H-MnO<sub>2</sub> (b).



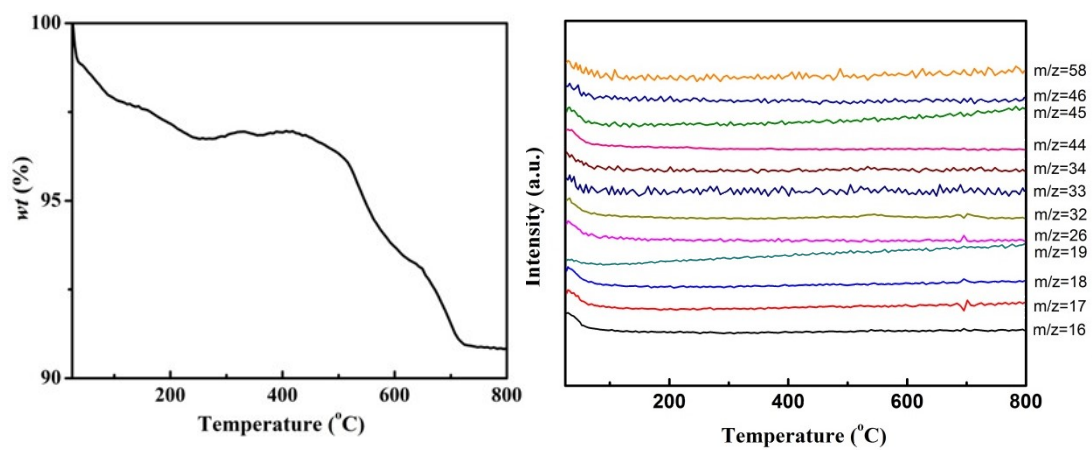

Figure S4 TG-MS analysis of 1D MnO<sub>2</sub> nanomaterials.

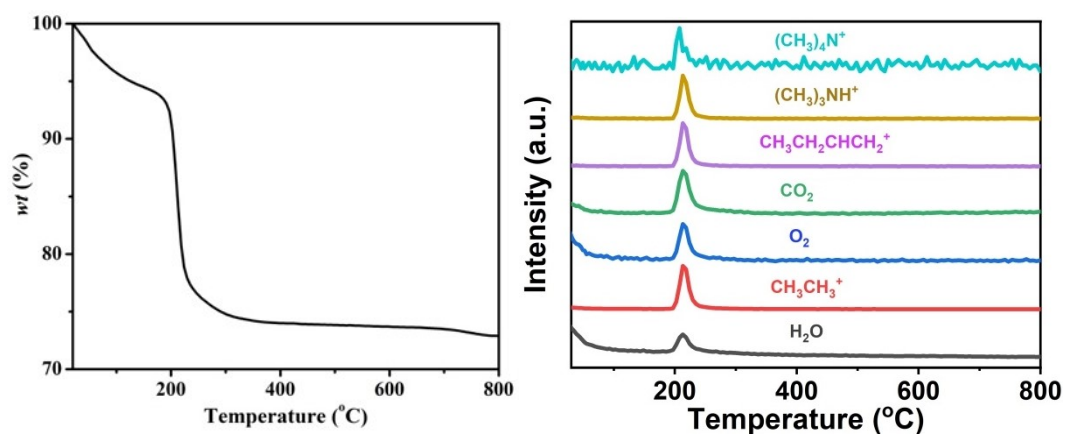

Figure S5 TG-MS analysis of H-MnO<sub>2</sub> nanomaterials.

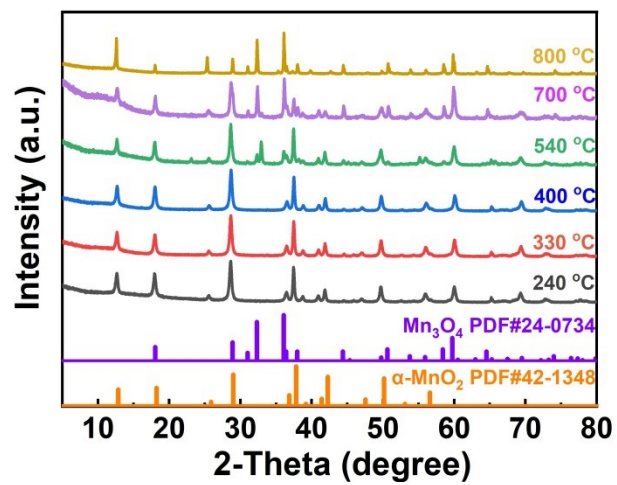

Figure S6 XRD patterns of 1D-MnO<sub>2</sub> at 240, 330, 400, 540, 700, 800 °C.

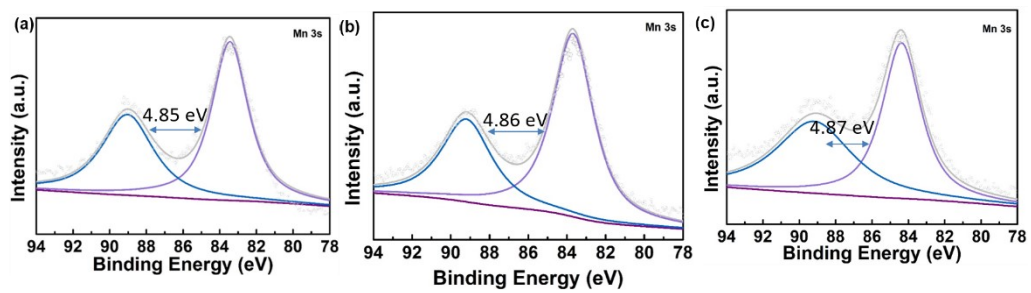

Figure S7 XPS spectra of Mn 3s peak of (a) H-MnO<sub>2</sub>-260, (b) 1D-MnO<sub>2</sub>-400, (c) 2D-MnO<sub>2</sub>-550.

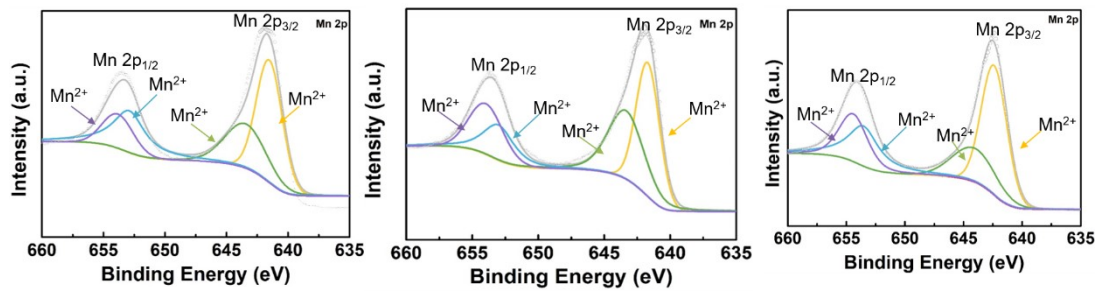

Figure S8 XPS spectra of Mn 3s peak of (a) H-MnO<sub>2</sub>-260, (b) 1D-MnO<sub>2</sub>-400, (c) 2D-MnO<sub>2</sub>-550.

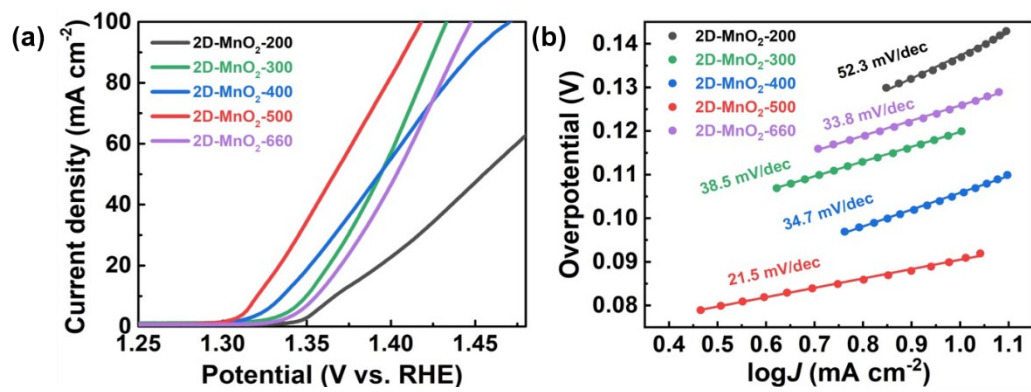

Figure S9 Linear sweep voltammetry (LSV) and Tafel plots of 2D-MnO<sub>2</sub>

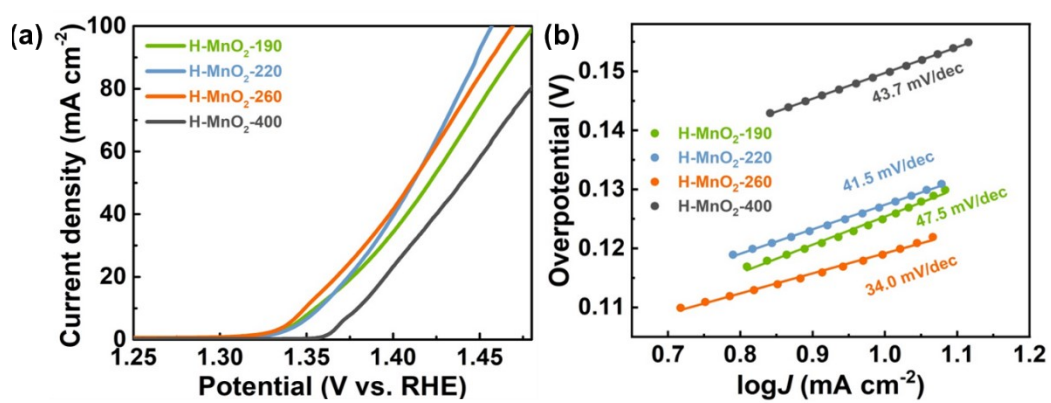

Figure S10 Linear sweep voltammetry (LSV) and Tafel plots of H-MnO<sub>2</sub>.

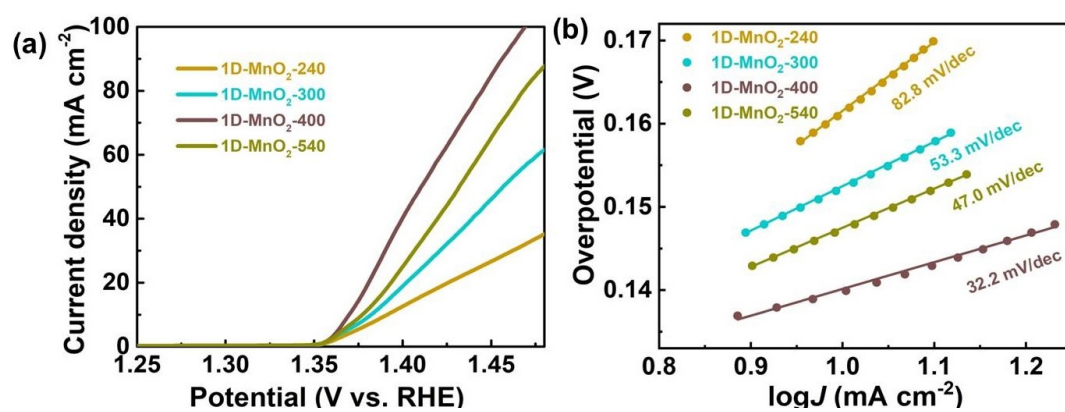

Figure S11 Linear sweep voltammetry (LSV) and Tafel plots of 1D-MnO<sub>2</sub>.



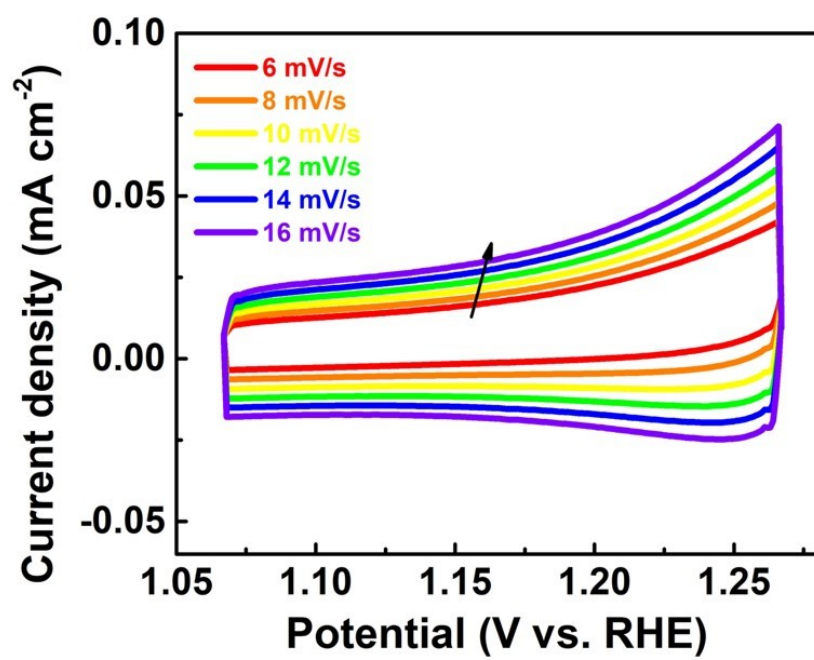

Figure S12 Blank cyclic voltammograms image.
